# Supplementary material for: Recurrent falls as the presentations of Gitelman syndrome in an octogenarian
Source: publisher site journal article supplement (doi:10.18632/aging.206216), 2025-03-04
Supplement: Supplementary file [file aging-vnull-206216-supplementary-material-SD1.pdf]

**SUPPLEMENTARY FIGURES**

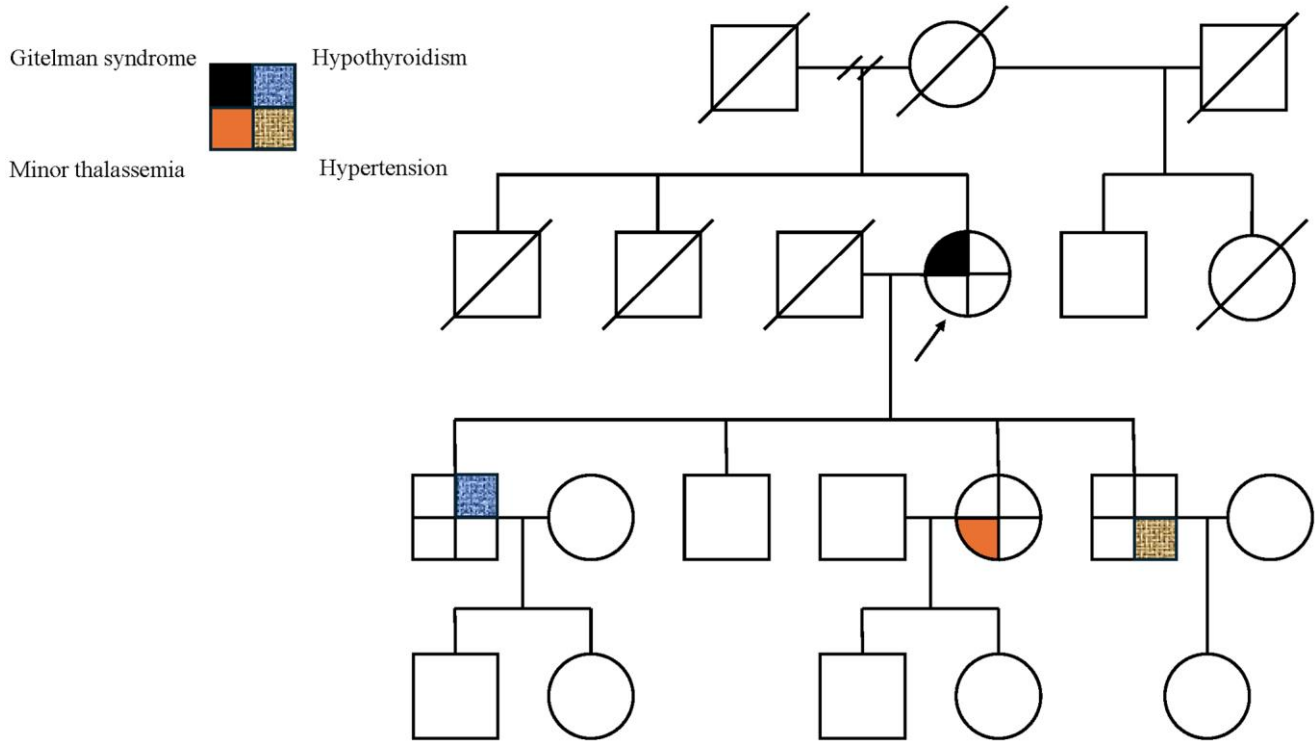

Supplementary Figure 1. Family pedigree.

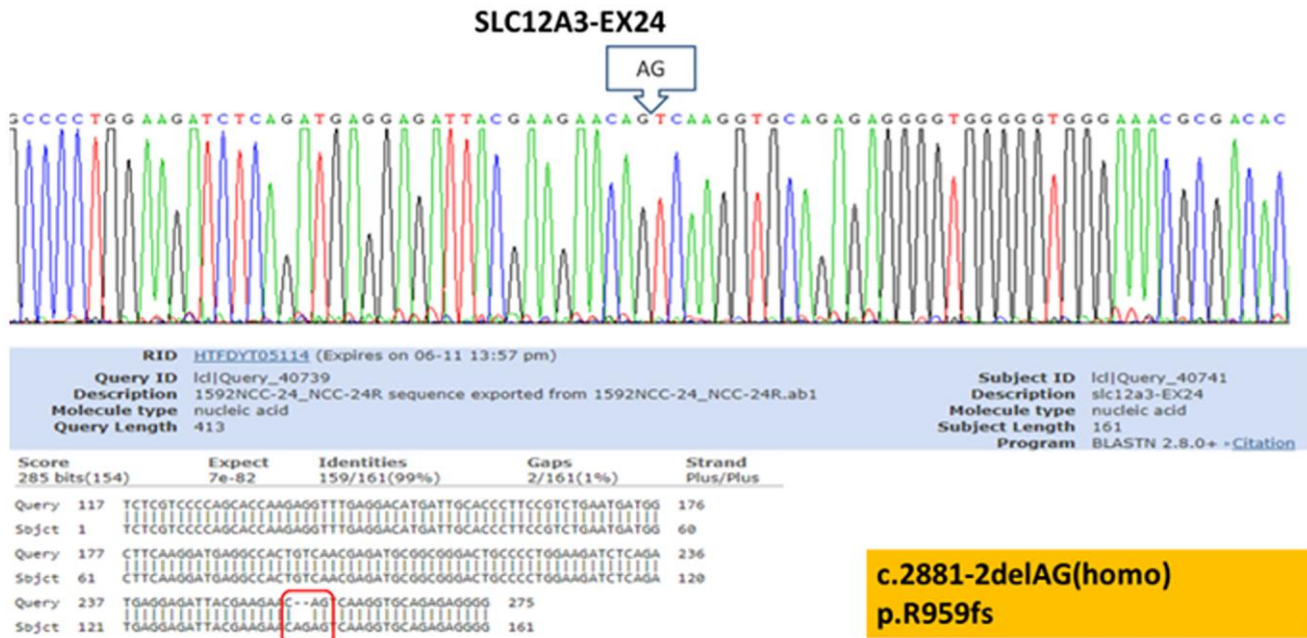

Supplementary Figure 2. *SLC12A3* genetic sequence analysis results of exon 24. Our patient carried a homozygous mutation of two base pair deletions at nucleotide 2881-2 (delAG).
